# Supplementary material
Source: publisher figshare collection journal article supplement (https://tandf.figshare.com/articles/dataset/_/20764946)
Supplement: Supplementary file 1 [file 1]

| Journal name | Nr. of papers |  | Physical workplace characteristics | Nr. of papers | Mental health indicators | Nr. of papers |
| --- | --- | --- | --- | --- | --- | --- |
| Building science (n=49) | | | |  |  |  |
| Building and Environment | 15 |  | Thermal comfort and temperature  Light and daylight  Air quality and ventilation  Noise, acoustics, and privacy  Office layout and design  Biophilia and views | 11  9  9  7  4  4 | Productivity  Sleep quality  Well-being  Concentration  Mood  Stress  Depressive symptoms  Fatigue  Engagement | 9  5  3  3  3  2  2  2  1 |
| Lighting Research Technology | 8 |  | Light and daylight | 8 | Mood  Well-being  Sleep quality  Depressive symptoms  Stress  Productivity  Concentration  Fatigue | 7  4  4  2  2  1  1  1 |
| Indoor Air | 4 |  | Air quality and ventilation  Noise, acoustics, and privacy  Thermal comfort and temperature  Biophilia and views  Light and daylight | 3  2  2  1  1 | Well-being  Concentration  Stress  Fatigue  Sleep quality | 3  3  2  1  1 |
| Building Research & Information | 4 |  | Light and daylight  Thermal comfort and temperature  Air quality and ventilation  Noise, acoustics, and privacy | 4  4  4  3 | Productivity  Sleep quality  Fatigue  Mood | 2  2  1  1 |
| Buildings | 3 |  | Light and daylight  Thermal comfort and temperature  Air quality and ventilation  Noise, acoustics, and privacy  Office layout and design  Biophilia and views  Look, feel and color | 3  3  3  3  3  2  1 | Productivity | 3 |
| Intelligent Buildings International | 3 |  | Thermal comfort and temperature  Biophilia and views  Air quality and ventilation  Noise, acoustics, and privacy  Office layout and design | 2  2  1  1  1 | Productivity  Well-being  Engagement | 3  1  1 |
| Building Services Engineering Research and Technology | 2 |  | Light and daylight  Thermal comfort and temperature  Air quality and ventilation  Noise, acoustics, and privacy  Office layout and design | 2  2  2  2  1 | Productivity | 2 |
| Indoor Built Environment | 1 |  | Noise, acoustics, and privacy | 1 | Concentration  Fatigue | 1  1 |
| Journal of Light & Visual Environment | 1 |  | Look, feel, and color  Light and daylight | 1  1 | Mood | 1 |
| Journal of Low Frequency Noise Vibration and Active Control | 1 |  | Noise, acoustics, and privacy | 1 | Fatigue | 1 |
| LEUKOS | 1 |  | Light and daylight | 1 | Productivity  Mood | 1  1 |
| Applied Occupational and Environmental Hygiene | 1 |  | Thermal comfort and temperature  Air quality and ventilation  Noise, acoustics, and privacy | 1  1  1 | Fatigue | 1 |
| Architectural Science Review | 1 |  | Thermal comfort and temperature  Air quality and ventilation | 1  1 | Productivity | 1 |
| Energies | 1 |  | Light and daylight  Thermal comfort and temperature  Biophilia and views  Air quality and ventilation  Noise, acoustics, and privacy | 1  1  1  1  1 | Productivity  Concentration  Mood | 1  1  1 |
| Energy and Buildings | 1 |  | Light and daylight | 1 | Productivity | 1 |
| Journal of Environmental Engineering and Landscape Management | 1 |  | Thermal comfort and temperature  Air quality and ventilation | 1  1 | Productivity  Concentration | 1  1 |
| Structural Survey | 1 |  | Light and daylight  Thermal comfort and temperature | 1  1 | Productivity  Concentration | 1  1 |
| Ergonomics, facilities, and real estate (n=29) | | | |  |  |  |
| Journal of Corporate Real Estate | 9 |  | Office layout and design  Light and daylight  Noise, acoustics, and privacy  Look, feel and color  Thermal comfort and temperature  Air quality and ventilation  Biophilia and views | 6  3  3  2  2  2  1 | Productivity  Concentration  Well-being  Stress  Engagement | 8  3  2  2  1 |
| Facilities | 6 |  | Thermal comfort and temperature  Light and daylight  Air quality and ventilation  Noise, acoustics, and privacy  Biophilia and views  Office layout and design  Look, feel, and colors | 5  4  4  4  2  2  1 | Productivity  Well-being  Depressive symptoms  Mood | 5  2  1  1 |
| Ergonomics | 4 |  | Noise, acoustics, and privacy  Light and daylight | 3  1 | Stress  Concentration  Fatigue  Sleep quality  Mood  Well-being | 3  2  2  1  1  1 |
| Journal of Facilities Management | 4 |  | Office layout and design  Noise, acoustics, and privacy  Look, feel and color  Light and daylight  Thermal comfort and temperature  Air quality and ventilation | 4  3  2  2  2  1 | Productivity  Concentration | 4  2 |
| Work | 4 |  | Office layout and design  Light and daylight  Air quality and ventilation  Thermal comfort and temperature  Biophilia and views  Noise, acoustics, and privacy | 2  2  2  1  1  1 | Productivity  Well-being  Stress  Engagement  Sleep quality | 3  1  1  1  1 |
| Applied Ergonomics | 2 |  | Light and daylight  Thermal comfort and temperature  Noise, acoustics, and privacy | 2  1  1 | Sleep quality  Concentration  Mood | 2  1  1 |
| Medicine and health (n=21) | | | |  |  |  |
| International Journal of Environmental Research and Public Health | 5 |  | Light and daylight  Biophilia and views  Air quality and ventilation  Noise, acoustics, and privacy  Look, feel and color | 2  2  1  1  1 | Stress  Productivity  Well-being  Concentration  Sleep quality  Fatigue  Mood | 4  2  2  2  2  1  1 |
| Occupational and Environmental Medicine | 4 |  | Air quality and ventilation  Thermal comfort and temperature  Noise, acoustics, and privacy  Office layout and design | 3  1  1  1 | Concentration  Fatigue  Stress  Mood | 3  3  1  1 |
| Journal of Circadian Rhythms | 2 |  | Light and daylight | 2 | Sleep quality  Well-being  Productivity  Concentration  Fatigue  Mood | 2  1  1  1  1  1 |
| Scandinavian Journal of Work, Environment and Health | 2 |  | Light and daylight | 2 | Sleep quality  Concentration  Mood | 2  1  1 |
| Journal of Occupational Health | 1 |  | Light and daylight  Thermal comfort and temperature | 1  1 | Well-being  Sleep quality | 1  1 |
| Journal of Occupational Medicine and Toxicology | 1 |  | Office layout and design | 1 | Stress  Concentration | 1  1 |
| Sleep Health | 1 |  | Light and daylight | 1 | Stress  Depressive symptoms  Sleep quality  Mood | 1  1  1  1 |
| Archives of Environmental Health: An International Journal | 1 |  | Thermal comfort and temperature  Air quality and ventilation | 1  1 | Concentration  Fatigue | 1  1 |
| Environment International | 1 |  | Light and daylight  Thermal comfort and temperature  Air quality and ventilation | 1  1  1 | Stress | 1 |
| European Journal of Cardiovascular Prevention and Rehabilitation | 1 |  | Light and daylight  Biophilia and views  Air quality and ventilation  Noise, acoustics, and privacy | 1  1  1  1 | Stress | 1 |
| Journal of Affective Disorders | 1 |  | Light and daylight | 1 | Depressive symptoms  Sleep quality  Mood | 1  1  1 |
| Journal of Clinical Sleep Medicine | 1 |  | Light and daylight | 1 | Sleep quality | 1 |
| Psychology and behavior (n=17) | | | |  |  |  |
| Journal of Environmental Psychology | 8 |  | Light and daylight  Noise, acoustics, and privacy  Biophilia and views  Office layout and design | 4  3  2  2 | Stress  Concentration  Burnout  Well-being  Sleep quality  Productivity  Mood | 4  4  2  2  2  1  1 |
| Environment and Behavior | 6 |  | Light and daylight  Office layout and design  Air quality and ventilation  Noise, acoustics, and privacy | 3  2  1  1 | Depressive symptoms  Well-being  Sleep quality  Mood  Productivity  Stress  Engagement  Concentration | 3  2  2  2  1  1  1  1 |
| Frontiers in Psychology | 2 |  | Noise, acoustics, and privacy  Office layout and design  Light and daylight  Thermal comfort and temperature  Biophilia and views  Air quality and ventilation | 2  2  1  1  1  1 | Well-being  Depressive symptoms  Engagement | 1  1  1 |
| Journal of Experimental Psychology: Applied | 1 |  | Biophilia and views  Air quality and ventilation  Office layout and design | 1  1  1 | Productivity  Engagement  Concentration | 1  1  1 |
| Nature (n=6) | | | |  |  |  |
| HortScience | 2 |  | Biophilia and views  Light and daylight  Thermal comfort and temperature  Air quality and ventilation  Noise, acoustics, and privacy | 2  1  1  1  1 | Well-being  Productivity  Stress | 1  1  1 |
| Horticultural Science and Technology | 1 |  | Light and daylight  Biophilia and views | 1  1 | Stress | 1 |
| HortTechnology | 1 |  | Biophilia and views | 1 | Stress | 1 |
| Journal of Japanese Society of Horticulture Science | 1 |  | Biophilia and views | 1 | Depressive symptoms | 1 |
| Scandinavian Journal of Forest Research | 1 |  | Biophilia and views | 1 | Stress | 1 |
| Others (n=11) | | | |  |  |  |
| Journal of Thermal Biology | 3 |  | Air quality and ventilation  Light and daylight  Thermal comfort and temperature  Noise, acoustics, and privacy | 3  2  2  2 | Productivity  Concentration  Fatigue | 1  1  1 |
| COLOR Research and Application | 2 |  | Look, feel and color | 2 | Productivity  Mood | 1  1 |
| Current Science | 1 |  | Light and daylight | 1 | Sleep quality | 1 |
| International Journal of Recent Technology and Engineering | 1 |  | Look, feel and color  Light and daylight | 1  1 | Productivity | 1 |
| PLOS ONE | 1 |  | Office layout and design | 1 | Burnout  Stress | 1  1 |
| Science of the Total Environment | 1 |  | Noise, acoustics, and privacy | 1 | Depressive symptoms | 1 |
| Scientific Reports | 1 |  | Light and daylight | 1 | Sleep quality | 1 |
| South African Journal of Economic and Management Sciences | 1 |  | Look, feel and color | 1 | Stress | 1 |
